# Supplementary material for: The antigenic identity of human class I MHC phosphopeptides is critically dependent upon phosphorylation status
Source: PubMed Central journal article supplement (PMC5589570; doi:10.18632/oncotarget.16952), 2017-04-08
Supplement: oncotarget-08-54160-s001.pdf [file oncotarget-08-54160-s001.pdf]

# The antigenic identity of human class I MHC phosphopeptides is critically dependent upon phosphorylation status

## Supplementary Materials

**Supplementary Table 1: Crystallisation, data processing and refinement statistics**

|                                     | PKD2                                          |                                               | RQA_V             |                  | RQI             |                   |
|-------------------------------------|-----------------------------------------------|-----------------------------------------------|-------------------|------------------|-----------------|-------------------|
| PDB ID CODE                         | 4NNX                                          | 4NNY                                          | 4NO2              | 4NO0             | 4NO3            | 4NO5              |
| Peptide sequence                    | RQApSLSISV                                    | RQASLSISV                                     | RQApSIELPSMAV     | RQASIELPSMAV     | RQIpSQDVKL      | RQISQDVKL         |
| Peptide source                      | PKD2                                          | PKD2                                          | LSP-1             | LSP-1            | AMPD2           | AMPD2             |
| <b>Crystallisation</b>              |                                               |                                               |                   |                  |                 |                   |
| Precipitant (%)                     | PEG 3350 (11)                                 | PEG 3350 (15)                                 | PEG 8K (20)       | PEG 3350 (18)    | PEG 3350 (12)   | PEG 3350 (19)     |
| Buffer (0.1 M)                      | HEPES pH 7.5                                  | HEPES pH 7.5                                  | HEPES pH 7.5      | HEPES pH 7.5     | Tacsimate pH 8  | Bis Tris pH 6.5   |
| Salt (M)                            | NaCl (0.15)                                   | NaCl (0.2)                                    | -                 | NH4-Acet (0.2)   | -               | Na tartrate (0.1) |
| Additive (0.003 M)                  | MgCl <sub>2</sub> , CdCl <sub>2</sub>         | MgCl <sub>2</sub> , CdCl <sub>2</sub>         | -                 | -                | -               | -                 |
| Protein (mg/ml)                     | 10                                            | 10                                            | 17                | 10.5             | 11              | 11                |
| <b>Data Processing</b>              |                                               |                                               |                   |                  |                 |                   |
| Resolution range (Å)                | 20–2.1                                        | 20–1.9                                        | 20–2              | 20–2.7           | 20–1.7          | 20–2.1            |
| Unit cell Parameters<br>a, b, c (Å) | 61.1, 79.8, 111.3                             | 60.4, 79.8, 110.7                             | 119.2, 54.7, 75.2 | 117.3, 117.3, 96 | 118, 54.2, 75.1 | 56.4, 79.3, 56.8  |
| α, β, γ (°)                         | 90, 90, 90                                    | 90, 90, 90                                    | 90, 104.8, 90     | 90, 90, 120      | 90, 104.9, 90   | 90, 115.5, 90     |
| Space Group                         | P2 <sub>1</sub> 2 <sub>1</sub> 2 <sub>1</sub> | P2 <sub>1</sub> 2 <sub>1</sub> 2 <sub>1</sub> | C2                | P3121            | C2              | P2 <sub>1</sub>   |
| Total reflections                   | 228414                                        | 346902                                        | 317693            | 773823           | 334999          | 299127            |
| Unique reflections                  | 31648                                         | 42471                                         | 31594             | 21363            | 46573           | 26307             |
| Multiplicity                        | 7.2                                           | 8.2                                           | 10                | 36               | 7.2             | 11.4              |
| Completeness (%) <sup>a</sup>       | 99 (96.4)                                     | 99 (94.6)                                     | 98.9 (96.1)       | 98.9 (99.5)      | 91.9 (75.4)     | 99.3 (98.8)       |
| R <sub>merge</sub> (%) <sup>b</sup> | 10.8 (38.5)                                   | 9.2 (52.9)                                    | 5.4 (46.4)        | 12.6 (81.6)      | 3.4 (32.8)      | 8.8 (24.0)        |
| I/σ(I)                              | 15.3 (4.8)                                    | 16.6 (4.9)                                    | 31.6 (4.5)        | 33.2 (6.2)       | 34 (4.7)        | 25.2 (11.4)       |
| <b>Refinement</b>                   |                                               |                                               |                   |                  |                 |                   |
| Resolution (Å)                      | 20–2.1                                        | 20–1.9                                        | 20–2              | 20–2.7           | 20–1.7          | 20–2.1            |
| Reflections used                    | 31643                                         | 42469                                         | 31330             | 21363            | 44256           | 25030             |
| R <sub>cryst</sub> (%) <sup>c</sup> | 19.8                                          | 20.8                                          | 20.8              | 26.9             | 20.8            | 18.8              |
| R <sub>free</sub> (%) <sup>d</sup>  | 23.6                                          | 22.8                                          | 24.9              | 30.9             | 23.2            | 23.7              |
| Protein residues                    | 382                                           | 382                                           | 386               | 580              | 383             | 382               |
| Water molecules                     | 211                                           | 301                                           | 258               | 51               | 391             | 266               |
| RMS deviations                      |                                               |                                               |                   |                  |                 |                   |
| Bond lengths (Å)                    | 0.016                                         | 0.009                                         | 0.010             | 0.018            | 0.0082          | 0.0096            |
| Bond angles (°)                     | 1.46                                          | 1.07                                          | 1.17              | 1.63             | 1.11            | 1.14              |

Figures in parentheses in the data processing section apply to data in the highest resolution shell. <sup>a</sup>Completeness = (number of independent reflections/total theoretical number). <sup>b</sup>R<sub>merge</sub> (I) = (Σ|I(i) - <I(h)>|/ΣI(i)), where I(i) is the ith observation of the intensity of the hkl reflection and <I> is the mean intensity from multiple measurements of the h,k,l reflection. <sup>c</sup>R<sub>cryst</sub> (F) = Σ<sub>h</sub>||F<sub>obs</sub>(h)| - |F<sub>calc</sub>(h)||/Σ<sub>h</sub>|F<sub>obs</sub>(h)| and |F<sub>calc</sub>(h)| are the observed and calculated structure factor amplitudes for the h, k, l reflection. <sup>d</sup>R<sub>free</sub> is calculated over reflections in a test set not included in atomic refinement (5% of data). Peptides are derived from PKD2 (protein kinase D2), LSP-1 (lymphocyte specific protein 1) and AMPD2 (adenosine monophosphate deaminase 2).

**Supplementary Table 2: Comparison of phosphate-independent stabilising contacts mediated by RQA\_Vp and RQA\_Vnp peptides and HLA-A\*0201**

| Peptide        | RQA_Vp                                     | RQA_Vnp                                      |
|----------------|--------------------------------------------|----------------------------------------------|
|                | HLA-A2                                     |                                              |
| R1             | Tyr159 (3)                                 | Tyr159 (3)                                   |
| Q2             | Tyr159 (5)                                 | Tyr159 (6)<br><b>Q2 (O) - Y159 (OH) 2.8Å</b> |
| A3             | Tyr159 (14)                                | Tyr159 (8)                                   |
| S4/p-Ser       | (See Table S3)                             | -                                            |
| I5             | Gln155 (11)<br>Leu156 (5)<br>Intra M10 (1) | His70 (21)                                   |
|                |                                            | Thr73 (3)                                    |
|                |                                            | <b>I5 (O) - His70 (N) 2.9Å</b>               |
|                |                                            | Arg97 (7)                                    |
| E6             | -                                          | Tyr99 (1)                                    |
|                |                                            | Intra M10 (3)                                |
|                |                                            | Ala69 (5)                                    |
| Total contacts | 39                                         | Thr73 (4)                                    |
|                |                                            | 61                                           |

Values in parentheses correspond to the number of hydrophobic and van der Waals contacts mediated between the peptide and HLA-A2. Hydrogen bonds with donor to receptor distances of 2.3-3.4Å are shown in bold. Intra corresponds to an intra-peptide stabilising interaction between I5 and M10.
